# Supplementary material
Source: publisher site journal article supplement (https://www.dovepress.com/get_supplementary_file.php?f=470797.docx)
Supplement: Supplementary file 1 [file get_supplementary_file.php]

**Addition of immune checkpoint inhibitor showed better efficacy for infiltrative hepatocellular carcinoma receiving hepatic arterial infusion chemotherapy and Lenatinib: a multicenter retrospective study**

**Table S1**. Standardized mean differences (SMD) in entire and PSM cohort.

**Table S2**. Univariable and multivariable analysis of prognostic factors for PFS in infiltrative HCC after PSM.

**Table S3**. Modified multivariable Cox proportional-hazards model with sequentially adjusted confounders in the entire cohort.

**Table S4**. Associations between treatment type and OS and PFS in the multivariable analysis and propensity score analysis.

**Table S5**. Cox’s proportional hazards model test of power analysis by PASS when the test is two-side.

**Table S6**. The relationship between liver function reserve with different level of HAIC for infiltrative HCC.

**Table S7**.Most common treatment-related adverse event in the entire cohort.

**Figure S1.** The representative features between nodular and infiltrative HCC. The nodular HCC presented with circular capsule (yellow arrow) and clear tumor boundary, and infiltrative HCC has the diffuse and permeative appearance, lacking a well-demarcated boundary (red arrow) and usually accompanied with satellites (blue arrow).

**Figure S2.** Subgroup analysis of OS.

**Figure S3.** Subgroup analysis of PFS.

**Figure S4.** Kaplan–Meier curves of PFS in patients with metastasis (A) and patients without metastasis in the PSM cohort (B). PFS in patients with and without metastasis in HAIC+Len group (C) and in HAIC+Len+ICI group (D).

**Figure S5**. Kaplan–Meier curves of OS (A) and PFS (B) in patients receiving low and high level of HAIC cycles in entire cohort.

**Table S1**. Standardized mean differences (SMD) in entire and PSM cohort.

| **Variable** | **SMD in entire cohort** | **SMD in PSM cohort** |
| --- | --- | --- |
| Age | 0.30 (0.07, 0.53) | 0.00 (-0.26, 0.26) |
| Sex | 0.00 (-0.23, 0.23) | 0.03 (-0.23, 0.28) |
| ALT, U/L | 0.19 (-0.04, 0.42) | 0.05 (-0.20, 0.31) |
| AST, U/L | 0.10 (-0.13, 0.33) | 0.11 (-0.14, 0.37) |
| HAIC level | 0.02 (-0.21, 0.25) | 0.14 (-0.11, 0.40) |
| Tumor size in liver, cm | 0.26 (0.03, 0.49) | 0.12 (-0.13, 0.38) |
| Tumor number in liver | 0.23 (0.00, 0.46) | 0.02 (-0.24, 0.27) |
| AFP, ng/mL | 0.08 (-0.15, 0.31) | 0.03 (-0.10, 0.11) |
| PVTT | 0.14 (-0.09, 0.37) | 0.15 (-0.10, 0.41) |
| ALBI grade | 0.26 (0.03, 0.49) | 0.21 (-0.05, 0.46) |
| Metastasis | 0.16 (-0.06, 0.39) | 0.23 (-0.03, 0.49) |
| BCLC stage | 0.12 (-0.10, 0.35) | 0.06 (-0.20, 0.31) |
| HBV DNA | 0.00 (-0.22, 0.23) | 0.03 (-0.22, 0.29) |
| Anti-virus | 0.10 (-0.13, 0.33) | 0.00 (-0.26, 0.26) |
| Cirrhosis | 0.12 (-0.11, 0.35) | 0.17 (-0.08, 0.43) |
| Portal hypertension | 0.28 (0.05, 0.51) | 0.02 (-0.24, 0.27) |

**Table S2**. Univariable and multivariable analysis of prognostic factors for PFS in infiltrative HCC after PSM

| **Variable** | **Univariable analysis** | | **Multivariable analysis** | |
| --- | --- | --- | --- | --- |
| **HR (95% CI)** | ***P value*** | **HR (95% CI)** | ***P value*** |
| **Treatment type**  HAIC+Len vs. HAIC+Len+ICI | 1.88 (1.43-2.48) | < 0001 | 2.06 (1.55-2.73) | <0.001 |
| **Age,** years  > 60 vs. ≤ 60 | 1.15 (0.73-1.81) | 0.539 |  |  |
| **Sex**  Male vs. Female | 1.40 (0.96-2.05) | 0.084 |  |  |
| **ALT**, U/L  > 40 vs. ≤ 40 | 1.44 (1.09-1.90) | 0.010 | 1.39 (1.05-1.84) | 0.020 |
| **AST**, U/L  > 40 vs. ≤ 40 | 0.99 (0.70-1.42) | 0.997 |  |  |
| **HAIC level**  Low vs. high | 0.92 (0.69-1.24) | 0.614 |  |  |
| **Tumor size in liver**, cm  ＞10 vs. ≤ 10 | 1.09 (0.82-1.45) | 0.549 |  |  |
| **Tumor number in liver**  > 3 vs. ≤ 3 | 1.45 (1.07-1.95) | 0.016 | 1.09 (0.80-1.49) | 0.574 |
| **AFP**, ng/mL  > 400 vs. ≤ 400 | 1.26 (0.94-1.68) | 0.120 |  |  |
| **PVTT type**  No  Type Ⅰ-Ⅱ  Type Ⅲ-Ⅳ | Reference  1.29 (0.90-1.85)  1.02 (0.72-1.45) | 0.160  0.923 |  |  |
| **ALBI grade**  Grade 1  Grade 2  Grade 3 | Reference  1.13 (0.52-2.47)  1.10 (0.52-2.38) | 0.756  0.796 |  |  |
| **Metastasis**  Yes vs. No | 1.75 (1.33-2.30) | < 0.001 | 2.03 (1.51-2.73) | <0.001 |
| **BCLC stage**  C vs. B | 1.64 (1.03-2.62) | 0.037 | 2.36 (1.39-3.98) | 0.001 |
| **HBV DNA**  Positive vs. Negative | 1.04 (0.79-1.36) | 0.802 |  |  |
| **Anti-virus**  No vs. Yes | 1.52 (1.12-2.05) | 0.007 | 1.62 (1.19-2.21) | 0.002 |
| **Cirrhosis**  No vs. yes | 1.06 (0.78-1.43) | 0.723 |  |  |
| **Portal hypertension**  Yes vs. No | 1.23 (0.84-1.51) | 0.424 |  |  |

Abbreviations: ALT, alanine aminotransferase; AST, aspartate aminotransferase; AFP, alpha-fetoprotein; ALBI, albumin-bilirubin; BCLC, Barcelona Clinic Liver Cancer; HAIC, hepatic arterial infusion chemotherapy; PVTT, portal vein tumor thrombus. CI, confidence interval; HR, hazard ratio.

**Table S3**. Modified multivariable Cox proportional-hazards model with sequentially adjusted confounders in the entire cohort

| **Variables** | **Overall survival** | | **Progression-free survival** | |
| --- | --- | --- | --- | --- |
| HR (95% CI) | *P value* | HR (95% CI) | *P value* |
| Not adjusted | 0.70 (0.53-0.92) | 0.011 | 0.51 (0.39-0.65) | <0.001 |
| Plus HAIC cycle | 0.69 (0.52-0.90) | 0.008 | 0.52 (0.40-0.67) | <0.001 |
| Plus tumor size in liver | 0.70 (0.53-0.92) | 0.011 | 0.52 (0.41-0.65) | <0.001 |
| Plus tumor number in liver | 0.70 (0.53-0.93) | 0.014 | 0.55 (0.42-0.67) | <0.001 |
| Plus AFP | 0.68 (0.51-0.89) | 0.006 | 0.54 (0.42-0.70) | <0.001 |
| Plus PVTT | 0.69 (0.52-0.92) | 0.011 | 0.53 (0.41-0.69) | <0.001 |
| Plus metastasis | 0.59 (0.44-0.80) | <0.001 | 0.45 (0.35-0.59) | <0.001 |
| Plus BCLC stage | 0.42 (0.30-0.59) | <0.001 | 0.45 (0.35-0.59) | <0.001 |
| Plus portal hypertension | 0.41 (0.30-0.57) | <0.001 | 0.48 (0.36-0.62) | <0.001 |

Abbreviations: AFP, alpha-fetoprotein; BCLC, Barcelona Clinic Liver Cancer; HAIC, hepatic arterial infusion chemotherapy; PVTT, portal vein tumor thrombus. CI, confidence interval.

**Table S4**. Associations between treatment type and OS and PFS in the multivariable analysis and propensity score analysis

| Analysis | Overall survival | Progression-free survival |
| --- | --- | --- |
| No. of events/No. of patients at risk (%) |  |  |
| HAIC+Len group | 131/173 (75.7%) | 168/173 (97.1%) |
| HAIC+Len+ICI group | 81/128 (63.3%) | 106/128 (82.8%) |
| *Multivariable analysis - HR (95% CI) *P* value | 0.41 (0.30-0.57) <0.001 | 0.48 (0.36-0.62) <0.001 |
| # PSM analysis - HR (95% CI) *P* value | 0.59 (0.43-0.82) 0.002 | 0.48 (0.36-0.65) <0.001 |

*Multivariable analysis adjusting model for potential confounders including HAIC cycle, tumor size, tumor number, AFP, PVTT, metastasis, BCLC stage.

#The covariates with PSM analysis adjusting model were according to covariates using for PSM model including age, tumor size, tumor number, AFP, PVTT, ALBI grade, metastasis, portal hypertension.

**Table S5**. Cox’s proportional hazards model test of power analysis by PASS when the test is two-side

| No. of  Control | No. of Cases | Total  Cases | HR of OS | Alpha | Beta | Power |
| --- | --- | --- | --- | --- | --- | --- |
| 117 | 117 | 234 | 1.63 | 0.05 | 0.1592 | 0.8408 |
| No. of  Control | No. of Cases | Total  Cases | HR of PFS | Alpha | Beta | Power |
| 117 | 117 | 234 | 2.06 | 0.05 | 0.0118 | 0.9882 |

**Table S6**. The relationship between liver function reserve with different level of HAIC for infiltrative HCC in PSM cohort

| **Variables** | **HAIC ≤ 3 times**  **(n=181)** | **HAIC> 3 times**  **(n=53)** | ***P value*** |
| --- | --- | --- | --- |
| **ALBI grade**  Grade 1  Grade 2  Grade 3 | 48 (26.5)  131 (72.4)  2 (1.1) | 11 (20.8)  37 (69.8)  5 (9.4) | 0.006 |
| **TBIL,** μmol/L  ≤ 17.1  > 17.1 | 76 (40.6)  105 (59.4) | 15 (28.3)  37 (71.7) | 0.072 |
| **ALT**, U/L  ≤ 40  > 40 | 72 (39.8)  99 (60.2) | 13 (24.5)  40 (75.5) | 0.021 |
| **AST**, U/L | 38 (21.0)  143 (79.0) | 4 (7.5)  49 (92.5) | 0.025 |
| ≤ 40 |
| > 40 |
| **Albumin**,g/L | 47 (26.0)  134 (74.0) | 21 (39.6)  32 (60.4) | 0.029 |
| < 35 |
| ≥ 35 |

Abbreviations: ALBI, albumin-bilirubin; ALT, alanine aminotransferase; AST, aspartate aminotransferase; HAIC, hepatic arterial infusion chemotherapy; TBIL, total bilirubin.

**Table S7**. Most common treatment-related adverse event in the entire cohort

| **Adverse events** | **HAIC+Len**  **(n=173)** | **HAIC+Len+ICI**  **(n=128)** | ***P value*** |
| --- | --- | --- | --- |
| **Neutropenia**  Grade 1–2  Grade 3-4 | 64 (37.0)  7 (4.0) | 47 (36.7)  4 (3.3) | 0.480 |
| **Thrombocytopenia**  Grade 1–2  Grade 3-4 | 57 (32.9)  9 (5.2) | 38 (29.7)  6 (4.7) | 0.300 |
| **Pain**  Grade 1–2  Grade 3-4 | 46 (26.6)  3 (1.7) | 37 (28.9)  2 (1.6) | 0.763 |
| **Bone marrow suppression**  Grade 1–2  Grade 3-4 | 15 (8.6)  3 (1.7) | 10 (7.8)  1 (0.8) | 0.147 |
| **Signs of liver decomposition**  Grade 1–2  Grade 3-4 | 9 (5.2)  2 (1.2) | 8 (6.3)  2 (1.6) | 0.645 |
| **Nausea**  Grade 1–2  Grade 3-4 | 114 (65.9)  8 (4.6) | 78 (60.9)  7 (5.5) | 0.918 |
| **Vomiting**  Grade 1–2  Grade 3-4 | 126 (72.8)  9 (5.2) | 102 (79.6)  5 (3.9) | 0.509 |
| **Hypertension**  Grade 1–2  Grade 3-4 | 46 (26.6)  7 (4.0) | 33 (32.0)  6 (4.7) | 0.822 |
| **Fatigue**  Grade 1–2  Grade 3-4 | 65 (37.6)  6 (3.4) | 53 (41.4)  8 (6.3) | 0.386 |
| **Rash or desquamation**  Grade 1–2  Grade 3-4 | 33 (19.1)  3 (1.7) | 29 (22.7)  7 (5.5) | 0.173 |
| **Diarrhea**  Grade 1–2  Grade 3-4 | 43 (28.9)  5 (2.9) | 41 (32.0)  5 (3.9) | 0.943 |
| **Decreased appetite**  Grade 1–2  Grade 3-4 | 124 (71.7)  5 (2.9) | 95 (74.2)  6 (4.7) | 0.466 |
| **Elevated ALT**  Grade 1–2  Grade 3-4 | 78 (45.1)  11 (6.4) | 72 (56.3)  9 (7.0) | 0.632 |
| **Elevated AST**  Grade 1–2  Grade 3-4 | 73 (40.5)  14 (8.1) | 62 (48.4)  11 (7.8) | 0.715 |
| **Hyperbilirubinemia**  Grade 1–2  Grade 3-4 | 97 (56.0)  5 (2.9) | 66 (51.5)  7 (5.5) | 0.226 |
| **Proteinuria**  Grade 1–2  Grade 3-4 | 62 (35.8)  14 (8.1) | 38 (29.7)  9 (7.0) | 0.920 |
| **Hypothyroidism**  Grade 1–2  Grade 3-4 | 41 (23.7)  3 (1.7) | 37 (28.9)  4 (3.1) | 0.622 |
| **Weight decreased**  Grade 1–2  Grade 3-4 | 107 (61.8)  7 (4.0) | 80 (62.8)  6 (4.7) | 0.812 |
| **Sensory neuropathy**  Grade 1–2  Grade 3-4 | 23 (13.3)  0 (0.0) | 19 (14.9)  1 (0.8) | 0.278 |

Abbreviations: ALT, alanine aminotransferase; AST, aspartate aminotransferase.


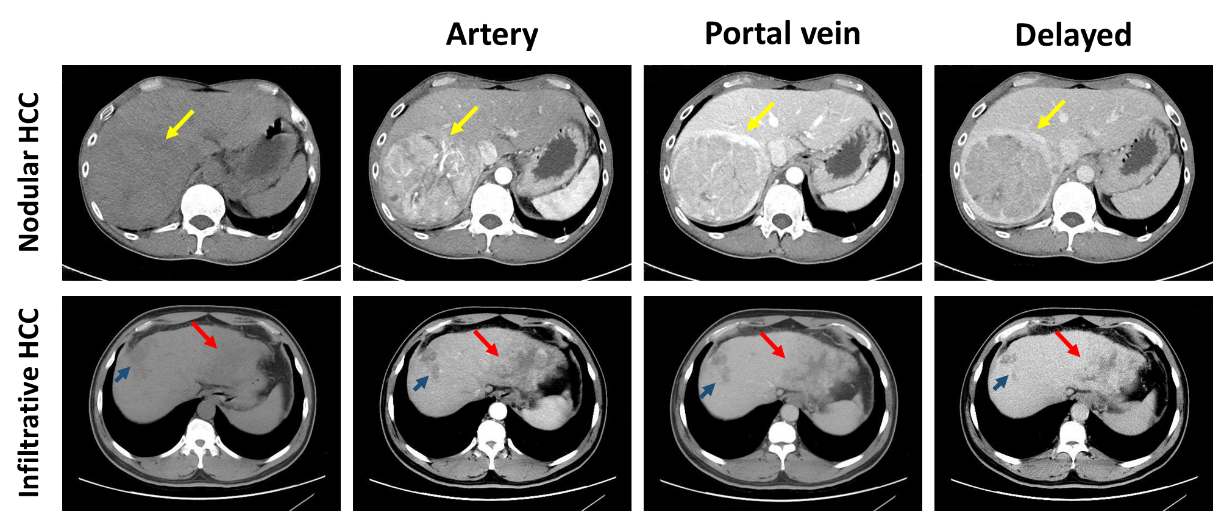


**Figure S1.** The representative features between nodular and infiltrative HCC. The nodular HCC presented with circular capsule (yellow arrow) and clear tumor boundary, and infiltrative HCC has the diffuse and permeative appearance, lacking a well-demarcated boundary (red arrow) and usually accompanied with satellites (blue arrow).


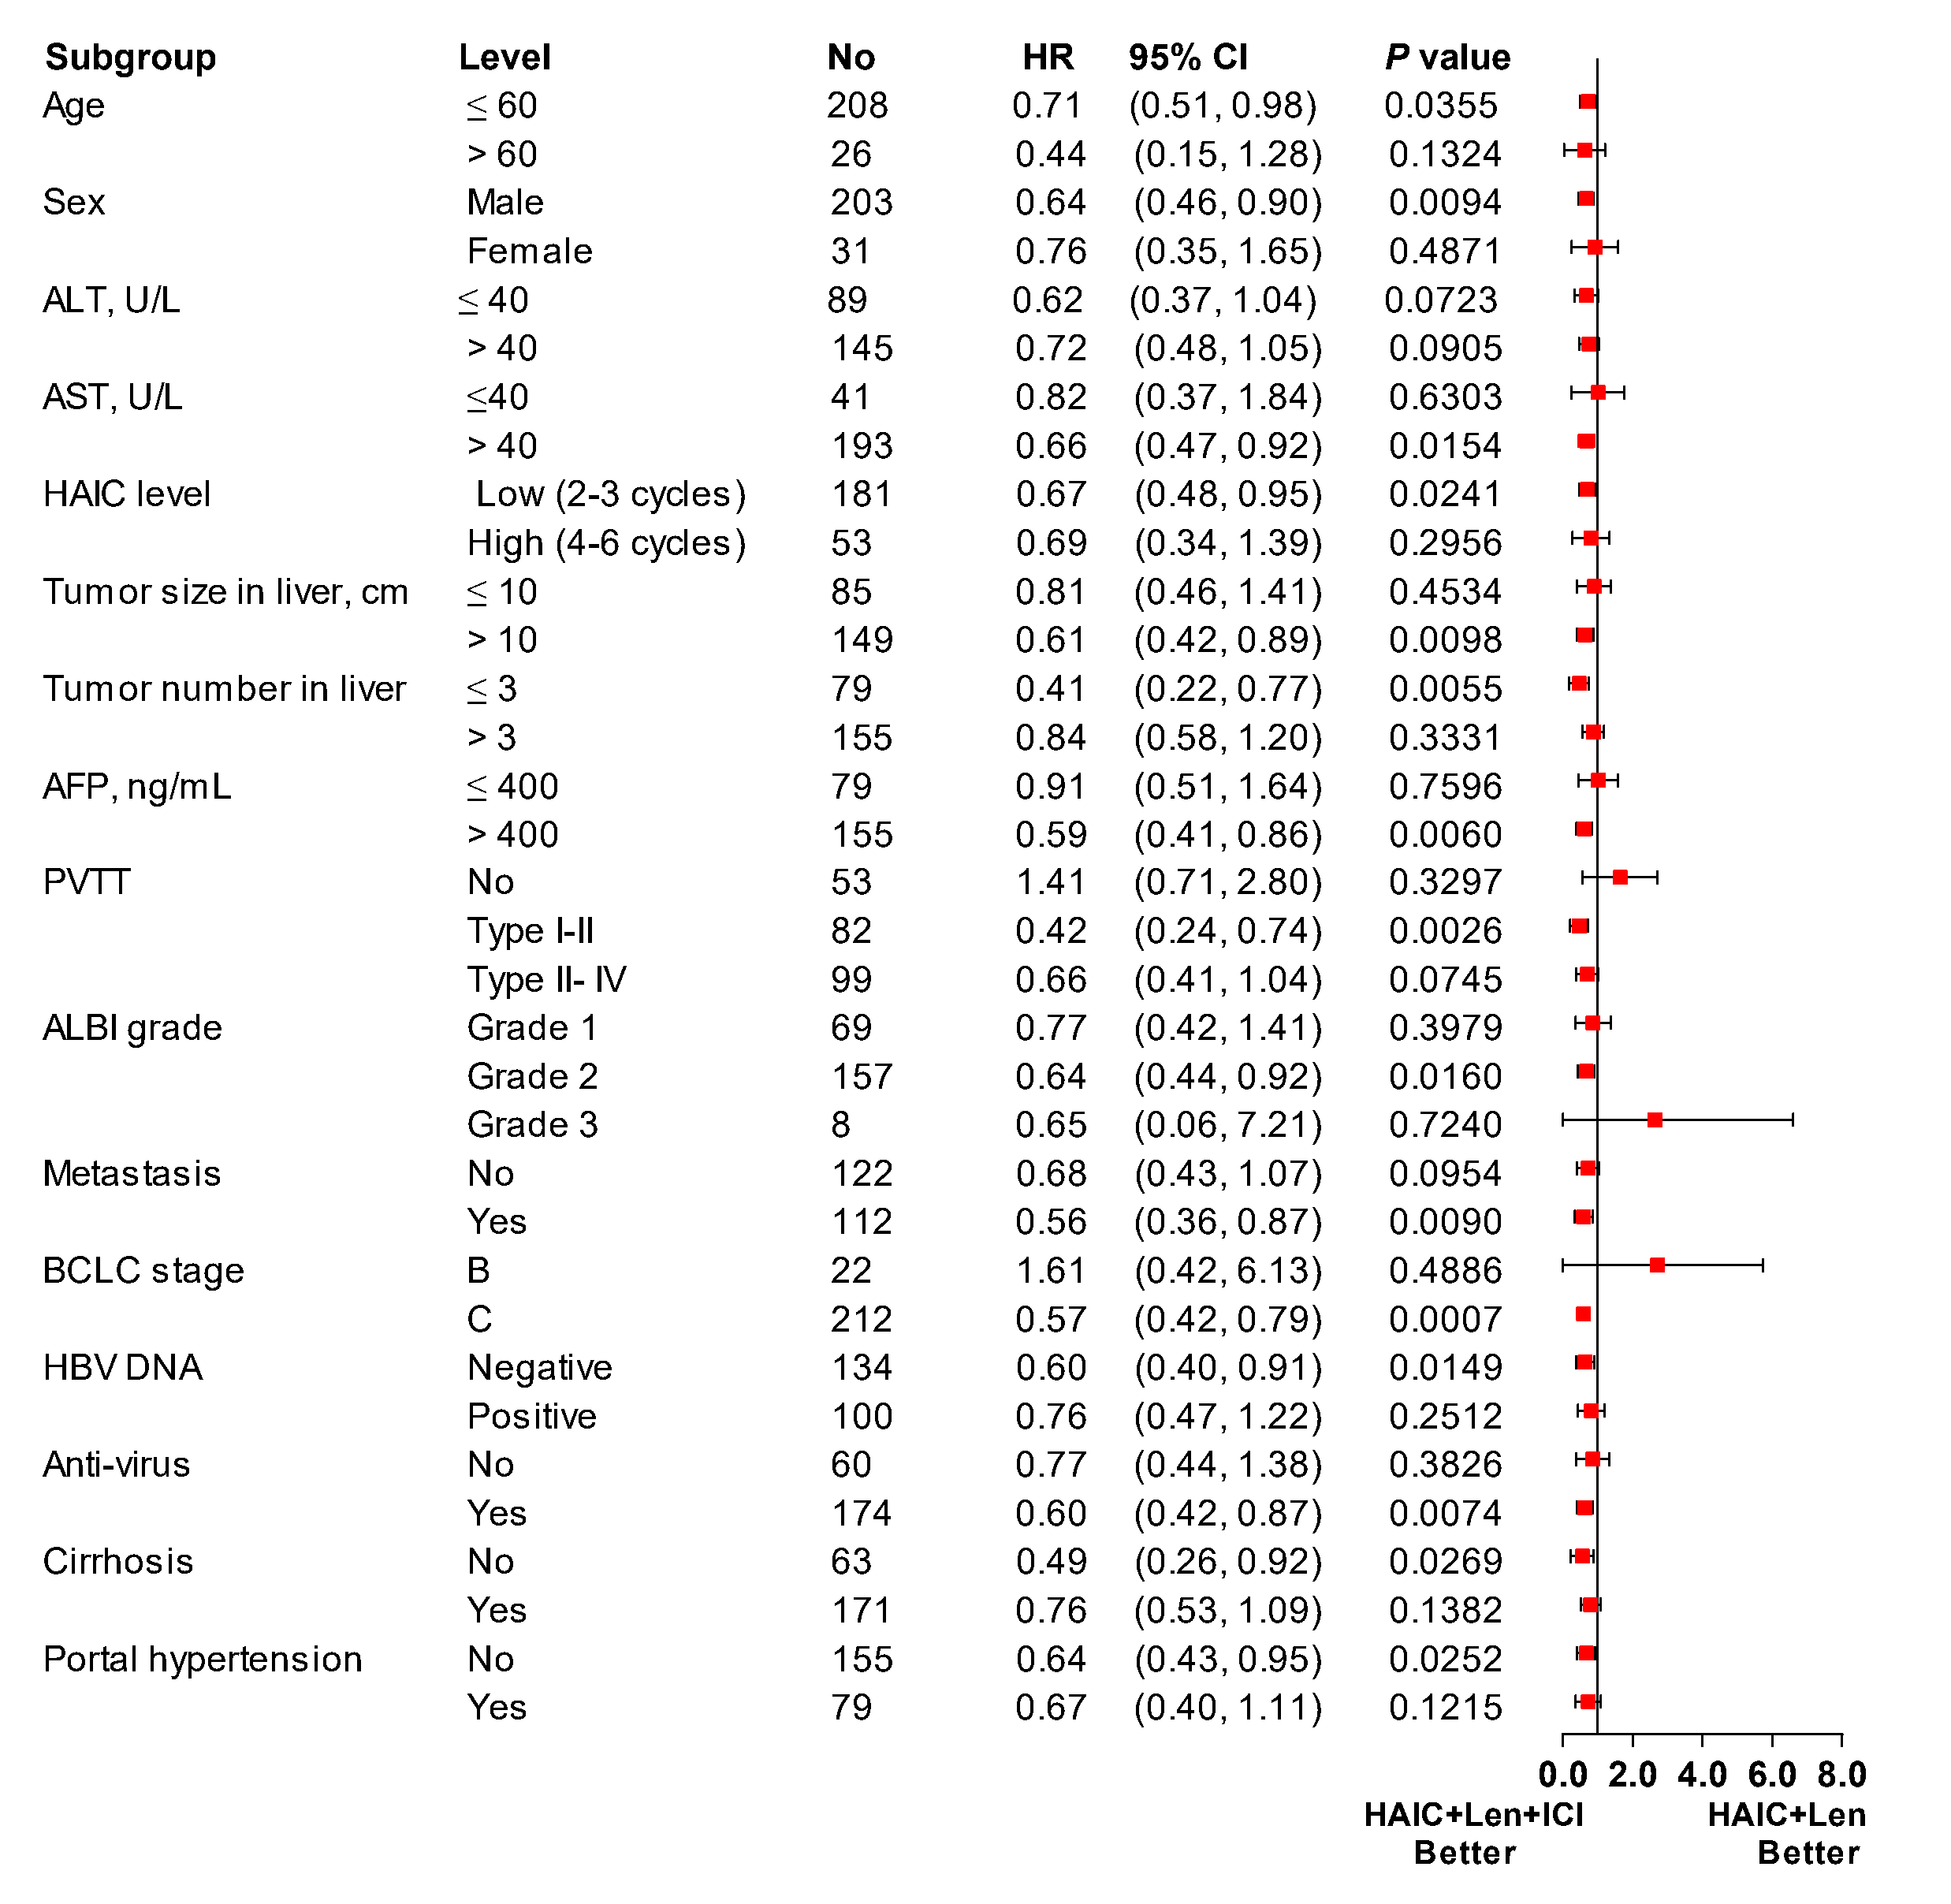


**Figure S2.** Subgroup analysis of OS.


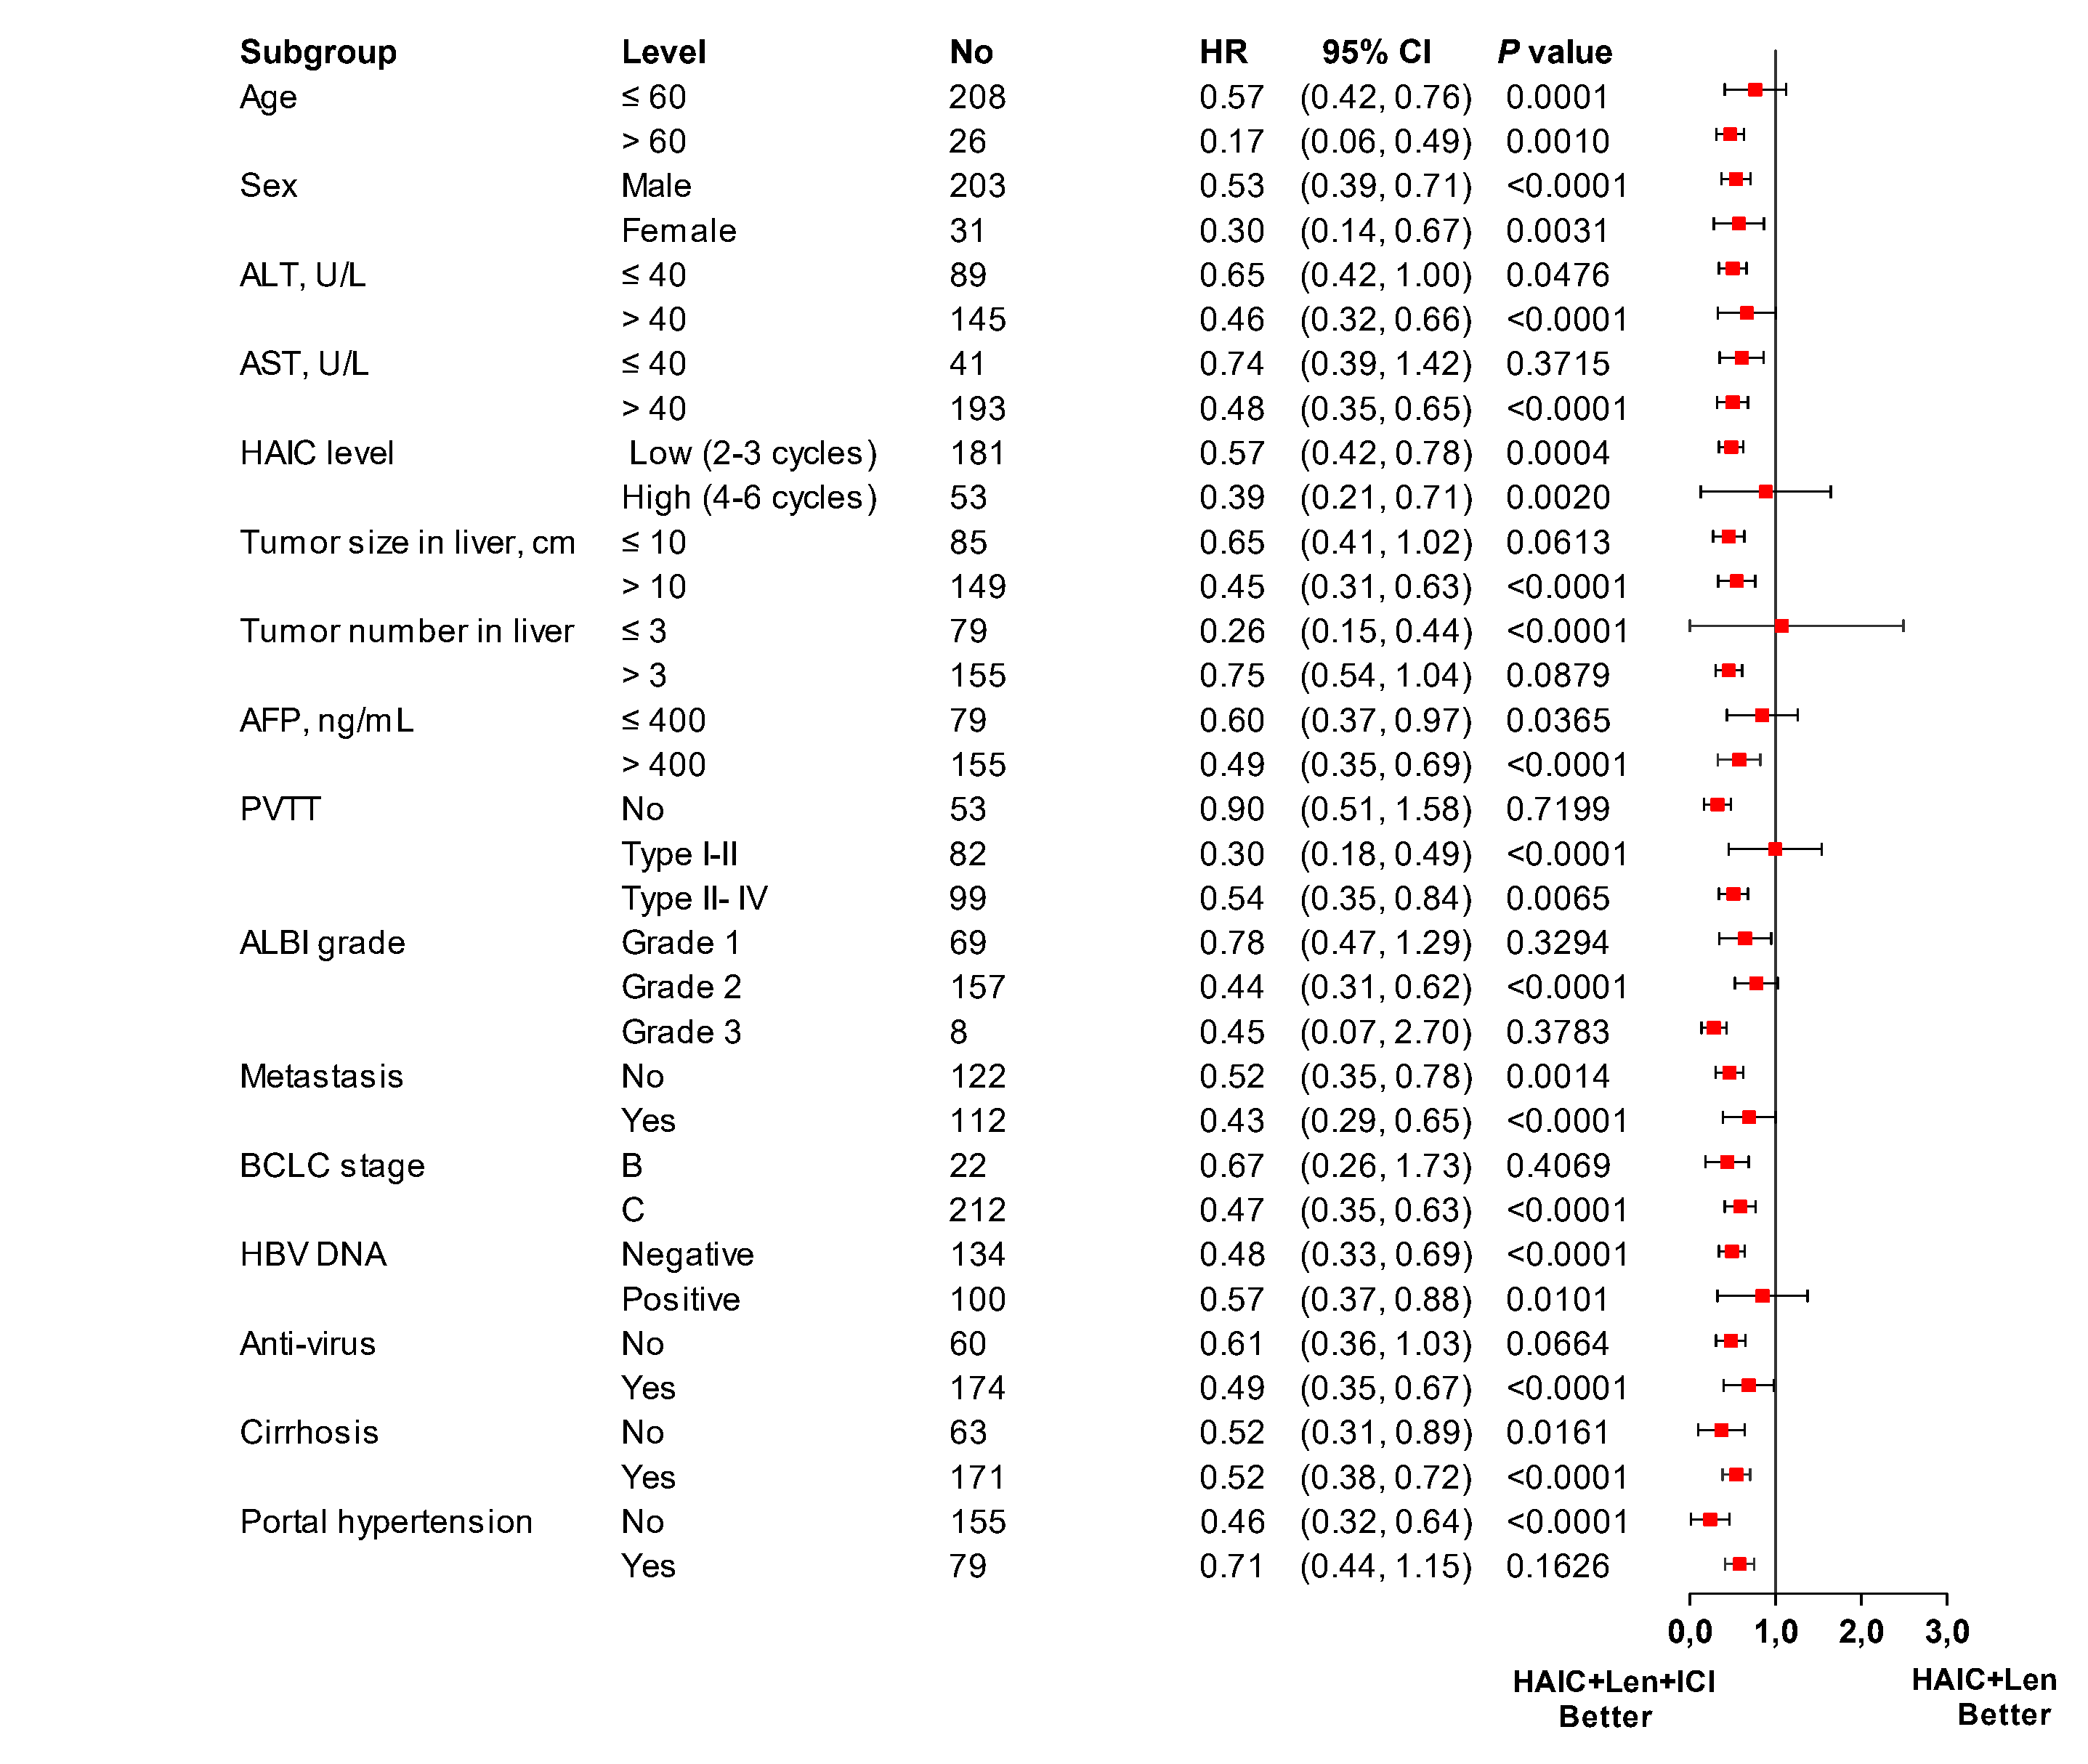


**Figure S3.** Subgroup analysis of PFS.


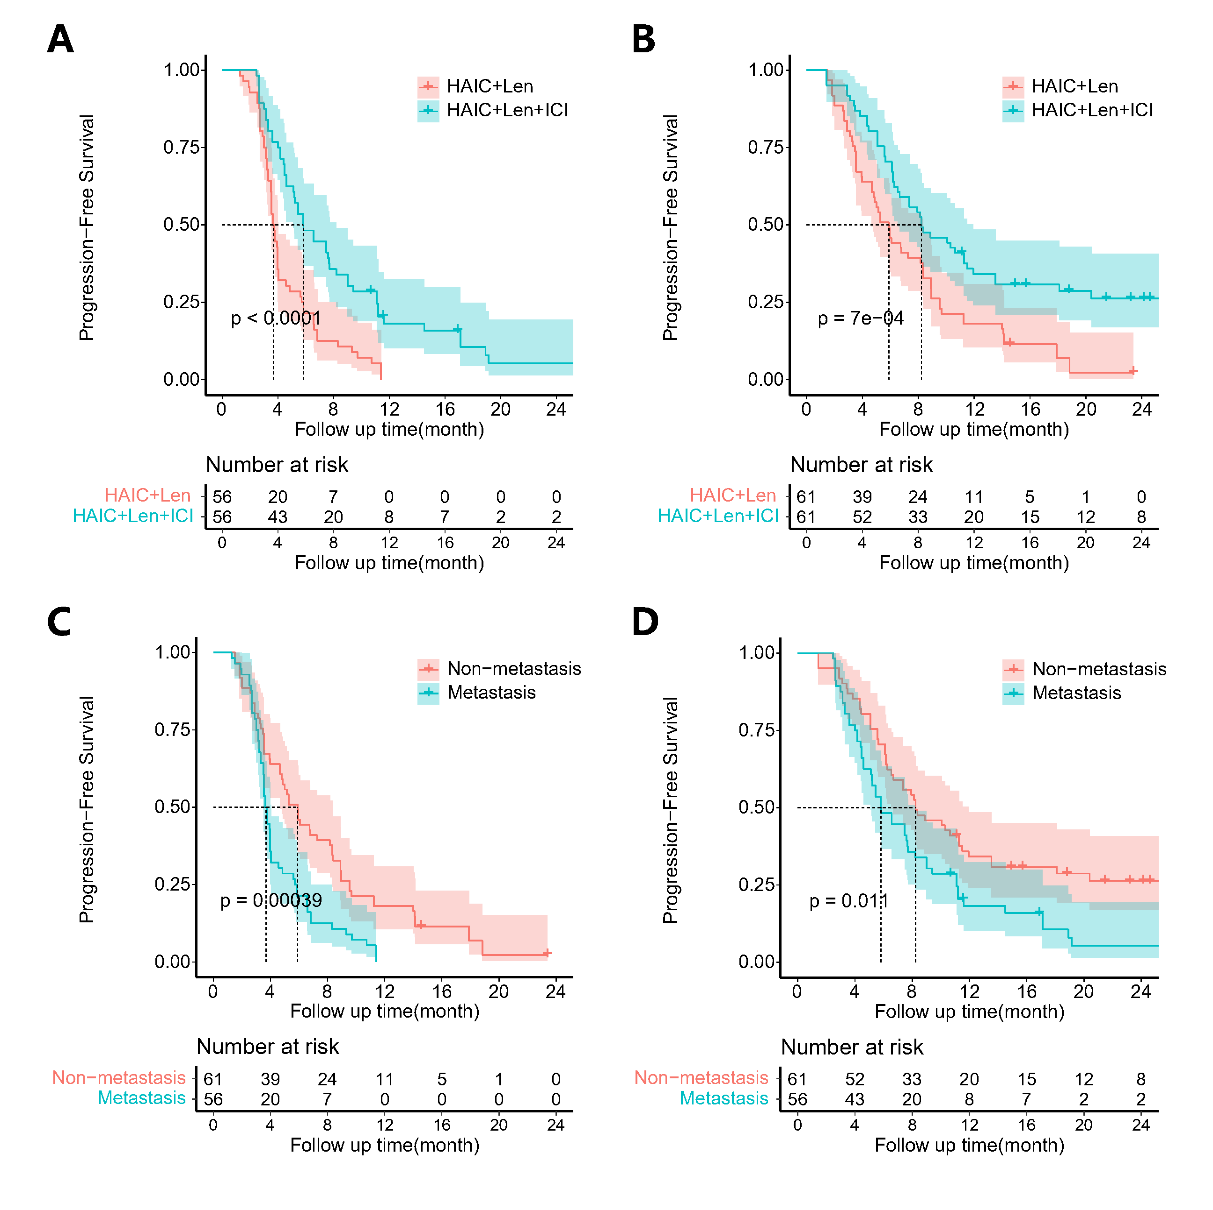


**Figure S4.** Kaplan–Meier curves of PFS in patients with metastasis (A) and patients without metastasis in the PSM cohort (B). PFS in patients with and without metastasis in HAIC+Len group (C) and HAIC+Len+ICI group (D).


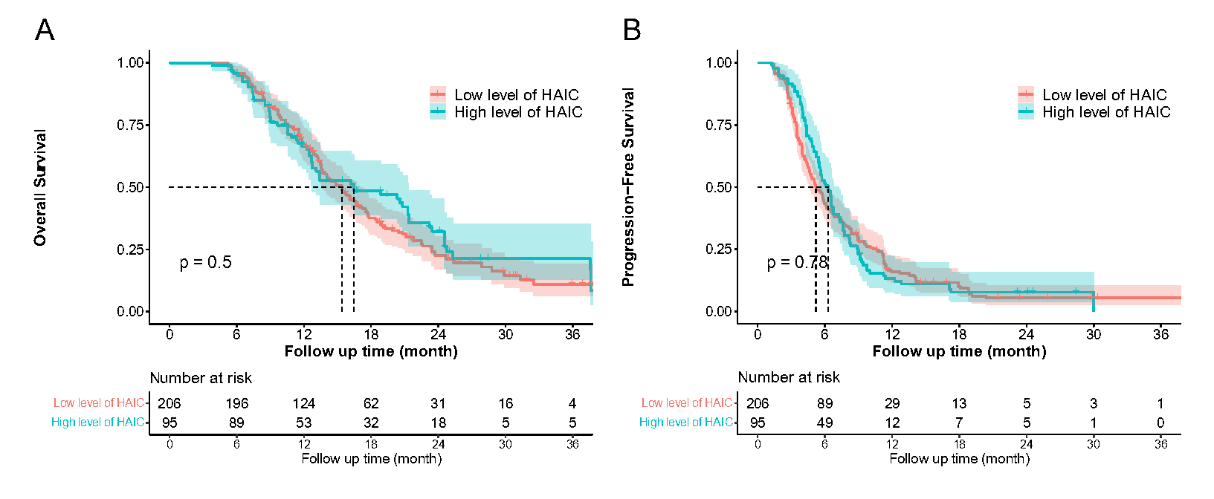


**Figure S5**. Kaplan–Meier curves of OS (A) and PFS (B) in patients receiving low and high level of HAIC cycles in entire cohort.
